# Supplementary material
Source: publisher figshare collection journal article supplement (https://acs.figshare.com/ndownloader/files/4703644)
Supplement: Supplementary file 1 [file 4703644]

 
data_jk001
 
_audit_creation_method            SHELXL-97
_chemical_name_systematic
;
 ?
;
_chemical_name_common             ?
_chemical_melting_point           ?
_chemical_formula_moiety          ?
_chemical_formula_sum
 'C36 H39 Cl8 Cu4 N5 O6'
_chemical_formula_weight          1175.48
 
loop_
 _atom_type_symbol
 _atom_type_description
 _atom_type_scat_dispersion_real
 _atom_type_scat_dispersion_imag
 _atom_type_scat_source
 'C'  'C'   0.0033   0.0016
 'International Tables Vol C Tables 4.2.6.8 and 6.1.1.4'
 'H'  'H'   0.0000   0.0000
 'International Tables Vol C Tables 4.2.6.8 and 6.1.1.4'
 'N'  'N'   0.0061   0.0033
 'International Tables Vol C Tables 4.2.6.8 and 6.1.1.4'
 'O'  'O'   0.0106   0.0060
 'International Tables Vol C Tables 4.2.6.8 and 6.1.1.4'
 'Cl'  'Cl'   0.1484   0.1585
 'International Tables Vol C Tables 4.2.6.8 and 6.1.1.4'
 'Cu'  'Cu'   0.3201   1.2651
 'International Tables Vol C Tables 4.2.6.8 and 6.1.1.4'
 
_symmetry_cell_setting            'monoclinic'
_symmetry_space_group_name_H-M    'C2/c'

 
loop_
 _symmetry_equiv_pos_as_xyz
 'x, y, z'
 '-x, y, -z+1/2'
 'x+1/2, y+1/2, z'
 '-x+1/2, y+1/2, -z+1/2'
 '-x, -y, -z'
 'x, -y, z-1/2'
 '-x+1/2, -y+1/2, -z'
 'x+1/2, -y+1/2, z-1/2'
 
_cell_length_a                    20.8240(10)
_cell_length_b                    12.1870(10)
_cell_length_c                    18.7390(10)
_cell_angle_alpha                 90.000(5)
_cell_angle_beta                  118.4150(10)
_cell_angle_gamma                 90.000(5)
_cell_volume                      4182.7(5)
_cell_formula_units_Z             4
_cell_measurement_temperature     293(2)
_cell_measurement_reflns_used     9581
_cell_measurement_theta_min       2.01
_cell_measurement_theta_max       29.32

 
_exptl_crystal_description        'prismatic'
_exptl_crystal_colour             'dark red'
_exptl_crystal_size_max           0.18
_exptl_crystal_size_mid           0.16
_exptl_crystal_size_min           0.12
_exptl_crystal_density_meas       ?
_exptl_crystal_density_diffrn     1.867
_exptl_crystal_density_method     'not measured'
_exptl_crystal_F_000              2360
_exptl_absorpt_coefficient_mu     2.570
_exptl_absorpt_correction_type    'multi-scan'
_exptl_absorpt_correction_T_min    0.803283
_exptl_absorpt_correction_T_max   1.0000
_exptl_absorpt_process_details    'BRUKER AXS SADABS'

 
_exptl_special_details
;
 ?
;
 
_diffrn_ambient_temperature       293(2)
_diffrn_radiation_wavelength      0.71069
_diffrn_radiation_type            MoK\a
_diffrn_radiation_source          'fine-focus sealed tube'
_diffrn_radiation_monochromator   graphite
_diffrn_measurement_device_type   'Bruker AXS Smart 1000'
_diffrn_measurement_method        'omega-scan'
_diffrn_detector_area_resol_mean  '8.192 pixels/mm'
_diffrn_standards_number          0
_diffrn_standards_interval_count  0
_diffrn_standards_interval_time   0
_diffrn_standards_decay_%         0
_diffrn_reflns_number             25354
_diffrn_reflns_av_R_equivalents   0.0416
_diffrn_reflns_av_sigmaI/netI     0.0473
_diffrn_reflns_limit_h_min        -27
_diffrn_reflns_limit_h_max        28
_diffrn_reflns_limit_k_min        -16
_diffrn_reflns_limit_k_max        15
_diffrn_reflns_limit_l_min        -25
_diffrn_reflns_limit_l_max        25
_diffrn_reflns_theta_min          2.01
_diffrn_reflns_theta_max          29.32
_reflns_number_total              5275
_reflns_number_gt                 3238
_reflns_threshold_expression      >2sigma(I)
 
_computing_data_collection        'SMART'
_computing_cell_refinement        ?
_computing_data_reduction         'SAINT (Bruker, 1998)'
_computing_structure_solution     'SIR97 (Giacovazzo et al., 1999)'
_computing_structure_refinement   'SHELXL-97 (Sheldrick, 1997)'
_computing_molecular_graphics     ?
_computing_publication_material   ?

 
_refine_special_details
;
 Refinement of F^2^ against ALL reflections.  The weighted R-factor wR and
 goodness of fit S are based on F^2^, conventional R-factors R are based
 on F, with F set to zero for negative F^2^. The threshold expression of
 F^2^ > 2sigma(F^2^) is used only for calculating R-factors(gt) etc. and is
 not relevant to the choice of reflections for refinement.  R-factors based
 on F^2^ are statistically about twice as large as those based on F, and R-
 factors based on ALL data will be even larger.
;
 
_refine_ls_structure_factor_coef  Fsqd
_refine_ls_matrix_type            full
_refine_ls_weighting_scheme       calc
_refine_ls_weighting_details
 'calc w=1/[\s^2^(Fo^2^)+(0.1105P)^2^+0.0000P] where P=(Fo^2^+2Fc^2^)/3'
_atom_sites_solution_primary      direct
_atom_sites_solution_secondary    difmap
_atom_sites_solution_hydrogens    geom
_refine_ls_hydrogen_treatment     constr
_refine_ls_extinction_method      none
_refine_ls_extinction_coef        ?
_refine_ls_number_reflns          5275
_refine_ls_number_parameters      272
_refine_ls_number_restraints      0
_refine_ls_R_factor_all           0.0992
_refine_ls_R_factor_gt            0.0589
_refine_ls_wR_factor_ref          0.1820
_refine_ls_wR_factor_gt           0.1631
_refine_ls_goodness_of_fit_ref    1.004
_refine_ls_restrained_S_all       1.004
_refine_ls_shift/su_max           0.001
_refine_ls_shift/su_mean          0.000
 
loop_
 _atom_site_label
 _atom_site_type_symbol
 _atom_site_fract_x
 _atom_site_fract_y
 _atom_site_fract_z
 _atom_site_U_iso_or_equiv
 _atom_site_adp_type
 _atom_site_occupancy
 _atom_site_symmetry_multiplicity
 _atom_site_calc_flag
 _atom_site_refinement_flags
 _atom_site_disorder_assembly
 _atom_site_disorder_group
Cu1 Cu 0.59525(3) 0.09302(5) 0.15944(3) 0.0409(2) Uani 1 1 d . . .
Cu2 Cu 0.60114(3) -0.02327(6) 0.01641(3) 0.0436(2) Uani 1 1 d . . .
N1 N 0.5577(2) 0.2396(3) 0.1706(2) 0.0414(9) Uani 1 1 d . . .
H1N H 0.5234 0.2254 0.1863 0.074(15) Uiso 1 1 calc R . .
N2 N 0.6570(2) 0.0690(3) 0.2800(2) 0.0409(9) Uani 1 1 d . . .
H2N H 0.6273 0.0458 0.3001 0.074(15) Uiso 1 1 calc R . .
O1 O 0.5735(2) 0.1182(3) 0.0451(2) 0.0480(9) Uani 1 1 d . . .
O2 O 0.6225(2) -0.0449(3) 0.1293(2) 0.0463(8) Uani 1 1 d . . .
O3 O 0.5892(2) 0.2335(4) 0.3323(2) 0.0568(10) Uani 1 1 d . . .
Cl1 Cl 0.53648(7) -0.00178(11) -0.11969(7) 0.0486(3) Uani 1 1 d . . .
Cl2 Cl 0.67602(8) -0.15107(15) 0.01555(8) 0.0651(5) Uani 1 1 d . . .
Cl3 Cl 0.6477(2) 0.5501(3) -0.0218(2) 0.1397(12) Uani 1 1 d . . .
Cl4 Cl 0.70956(16) -0.43819(19) 0.33385(16) 0.1009(7) Uani 1 1 d . . .
C1 C 0.5894(3) 0.2179(5) 0.0265(3) 0.0433(11) Uani 1 1 d . . .
C2 C 0.6320(3) 0.2304(6) -0.0127(3) 0.0560(14) Uani 1 1 d . . .
H2 H 0.6497 0.1691 -0.0273 0.062(8) Uiso 1 1 calc R . .
C3 C 0.6478(4) 0.3367(6) -0.0296(4) 0.0617(16) Uani 1 1 d . . .
H3 H 0.6747 0.3449 -0.0571 0.062(8) Uiso 1 1 calc R . .
C4 C 0.6244(4) 0.4272(6) -0.0067(4) 0.0607(16) Uani 1 1 d . . .
C5 C 0.5810(4) 0.4130(5) 0.0326(3) 0.0561(14) Uani 1 1 d . . .
H5 H 0.5635 0.4747 0.0472 0.062(8) Uiso 1 1 calc R . .
C6 C 0.5643(3) 0.3112(4) 0.0496(3) 0.0423(11) Uani 1 1 d . . .
C7 C 0.5180(3) 0.2958(5) 0.0903(3) 0.0455(12) Uani 1 1 d . . .
H7A H 0.5013 0.3670 0.0979 0.043(5) Uiso 1 1 calc R . .
H7B H 0.4753 0.2529 0.0551 0.043(5) Uiso 1 1 calc R . .
C8 C 0.6105(3) 0.3160(4) 0.2325(3) 0.0465(12) Uani 1 1 d . . .
H8A H 0.5853 0.3827 0.2331 0.043(5) Uiso 1 1 calc R . .
H8B H 0.6481 0.3354 0.2182 0.043(5) Uiso 1 1 calc R . .
C9 C 0.6452(3) 0.2654(4) 0.3152(3) 0.0434(11) Uani 1 1 d . . .
H9 H 0.6740 0.3223 0.3544 0.043(14) Uiso 1 1 calc R . .
C10 C 0.6966(3) 0.1681(5) 0.3259(3) 0.0474(12) Uani 1 1 d . . .
H10A H 0.7313 0.1904 0.3080 0.043(5) Uiso 1 1 calc R . .
H10B H 0.7239 0.1499 0.3831 0.043(5) Uiso 1 1 calc R . .
C11 C 0.7145(3) -0.0186(5) 0.2980(3) 0.0498(13) Uani 1 1 d . . .
H11A H 0.7476 0.0063 0.2785 0.043(5) Uiso 1 1 calc R . .
H11B H 0.7426 -0.0281 0.3563 0.043(5) Uiso 1 1 calc R . .
C12 C 0.6830(3) -0.1275(4) 0.2598(3) 0.0413(11) Uani 1 1 d . . .
C13 C 0.7027(3) -0.2207(4) 0.3076(3) 0.0468(12) Uani 1 1 d . . .
H13 H 0.7330 -0.2147 0.3632 0.062(8) Uiso 1 1 calc R . .
C14 C 0.6776(3) -0.3235(5) 0.2733(3) 0.0503(13) Uani 1 1 d . . .
C15 C 0.6306(3) -0.3313(5) 0.1912(4) 0.0533(13) Uani 1 1 d . . .
H15 H 0.6119 -0.3993 0.1681 0.062(8) Uiso 1 1 calc R . .
C16 C 0.6113(3) -0.2383(5) 0.1431(3) 0.0481(13) Uani 1 1 d . . .
H16 H 0.5794 -0.2442 0.0877 0.062(8) Uiso 1 1 calc R . .
C17 C 0.6385(3) -0.1373(4) 0.1761(3) 0.0413(11) Uani 1 1 d . . .
N1S N 0.5000 -0.4588(11) 0.2500 0.151(6) Uani 1 2 d S . .
C1S C 0.5000 -0.3651(11) 0.2500 0.091(4) Uani 1 2 d S . .
C2S C 0.5000 -0.2498(9) 0.2500 0.072(3) Uani 1 2 d S . .
H2S1 H 0.4507 -0.2236 0.2206 0.108 Uiso 0.50 1 calc PR . .
H2S2 H 0.5276 -0.2236 0.2246 0.108 Uiso 0.50 1 calc PR . .
H2S3 H 0.5217 -0.2236 0.3049 0.108 Uiso 0.50 1 calc PR . .
 
loop_
 _atom_site_aniso_label
 _atom_site_aniso_U_11
 _atom_site_aniso_U_22
 _atom_site_aniso_U_33
 _atom_site_aniso_U_23
 _atom_site_aniso_U_13
 _atom_site_aniso_U_12
Cu1 0.0481(4) 0.0421(4) 0.0265(3) -0.0028(2) 0.0130(2) 0.0029(3)
Cu2 0.0480(4) 0.0492(4) 0.0286(3) -0.0028(2) 0.0143(3) 0.0081(3)
N1 0.047(2) 0.046(2) 0.0287(18) -0.0031(17) 0.0163(17) -0.0011(19)
N2 0.044(2) 0.044(2) 0.0302(19) -0.0019(17) 0.0141(17) -0.0009(18)
O1 0.067(2) 0.044(2) 0.0341(17) -0.0024(15) 0.0248(17) 0.0028(17)
O2 0.060(2) 0.046(2) 0.0291(16) 0.0004(15) 0.0178(16) 0.0074(17)
O3 0.052(2) 0.076(3) 0.047(2) 0.005(2) 0.0276(18) 0.006(2)
Cl1 0.0535(7) 0.0515(7) 0.0321(6) -0.0002(5) 0.0133(5) 0.0027(6)
Cl2 0.0599(8) 0.0871(12) 0.0403(7) -0.0011(7) 0.0173(6) 0.0315(8)
Cl3 0.153(3) 0.114(2) 0.133(2) 0.0200(19) 0.052(2) -0.027(2)
Cl4 0.135(2) 0.0780(13) 0.0983(16) 0.0064(12) 0.0622(15) 0.0134(13)
C1 0.046(3) 0.049(3) 0.029(2) 0.002(2) 0.013(2) -0.001(2)
C2 0.059(3) 0.072(4) 0.040(3) -0.002(3) 0.026(3) 0.004(3)
C3 0.066(4) 0.078(4) 0.046(3) 0.001(3) 0.031(3) -0.015(3)
C4 0.060(4) 0.073(4) 0.038(3) 0.009(3) 0.015(3) -0.010(3)
C5 0.067(4) 0.049(3) 0.039(3) -0.003(2) 0.014(3) 0.004(3)
C6 0.048(3) 0.043(3) 0.028(2) 0.000(2) 0.013(2) 0.001(2)
C7 0.050(3) 0.046(3) 0.036(2) 0.001(2) 0.017(2) 0.005(2)
C8 0.056(3) 0.041(3) 0.040(3) -0.004(2) 0.021(2) -0.006(2)
C9 0.048(3) 0.049(3) 0.031(2) -0.008(2) 0.017(2) -0.002(2)
C10 0.043(3) 0.053(3) 0.038(3) -0.009(2) 0.013(2) -0.006(2)
C11 0.048(3) 0.051(3) 0.034(3) 0.001(2) 0.006(2) 0.002(2)
C12 0.039(2) 0.045(3) 0.033(2) -0.003(2) 0.0117(19) 0.001(2)
C13 0.053(3) 0.048(3) 0.035(2) 0.003(2) 0.018(2) 0.009(2)
C14 0.061(3) 0.046(3) 0.048(3) 0.001(2) 0.030(3) 0.012(3)
C15 0.062(3) 0.045(3) 0.060(3) -0.007(3) 0.035(3) 0.001(3)
C16 0.048(3) 0.054(3) 0.035(2) -0.010(2) 0.014(2) -0.002(2)
C17 0.041(2) 0.047(3) 0.036(2) 0.000(2) 0.019(2) 0.008(2)
N1S 0.122(11) 0.088(9) 0.27(2) 0.000 0.119(13) 0.000
C1S 0.069(7) 0.067(7) 0.129(11) 0.000 0.042(7) 0.000
C2S 0.056(5) 0.075(7) 0.086(7) 0.000 0.034(5) 0.000
 
_geom_special_details
;
 All esds (except the esd in the dihedral angle between two l.s. planes)
 are estimated using the full covariance matrix.  The cell esds are taken
 into account individually in the estimation of esds in distances, angles
 and torsion angles; correlations between esds in cell parameters are only
 used when they are defined by crystal symmetry.  An approximate (isotropic)
 treatment of cell esds is used for estimating esds involving l.s. planes.
;
 
loop_
 _geom_bond_atom_site_label_1
 _geom_bond_atom_site_label_2
 _geom_bond_distance
 _geom_bond_site_symmetry_2
 _geom_bond_publ_flag
Cu1 O2 1.942(4) . ?
Cu1 O1 1.991(3) . ?
Cu1 N1 2.001(4) . ?
Cu1 N2 2.020(4) . ?
Cu1 Cl1 2.7150(16) 5_655 ?
Cu2 O2 1.961(3) . ?
Cu2 O1 1.972(4) . ?
Cu2 Cl2 2.2094(15) . ?
Cu2 Cl1 2.2623(13) . ?
N1 C8 1.485(6) . ?
N1 C7 1.495(6) . ?
N1 H1N 0.9100 . ?
N2 C10 1.485(6) . ?
N2 C11 1.516(7) . ?
N2 H2N 0.9100 . ?
O1 C1 1.348(6) . ?
O2 C17 1.368(6) . ?
O3 C9 1.402(6) . ?
Cl1 Cu1 2.7150(16) 5_655 ?
Cl3 C4 1.640(7) . ?
Cl4 C14 1.722(6) . ?
C1 C6 1.402(8) . ?
C1 C2 1.403(8) . ?
C2 C3 1.409(9) . ?
C2 H2 0.9300 . ?
C3 C4 1.355(9) . ?
C3 H3 0.9300 . ?
C4 C5 1.423(10) . ?
C5 C6 1.367(8) . ?
C5 H5 0.9300 . ?
C6 C7 1.498(7) . ?
C7 H7A 0.9700 . ?
C7 H7B 0.9700 . ?
C8 C9 1.496(7) . ?
C8 H8A 0.9700 . ?
C8 H8B 0.9700 . ?
C9 C10 1.545(8) . ?
C9 H9 0.9800 . ?
C10 H10A 0.9700 . ?
C10 H10B 0.9700 . ?
C11 C12 1.502(7) . ?
C11 H11A 0.9700 . ?
C11 H11B 0.9700 . ?
C12 C13 1.383(7) . ?
C12 C17 1.396(7) . ?
C13 C14 1.392(8) . ?
C13 H13 0.9300 . ?
C14 C15 1.378(9) . ?
C15 C16 1.384(8) . ?
C15 H15 0.9300 . ?
C16 C17 1.373(8) . ?
C16 H16 0.9300 . ?
N1S C1S 1.142(16) . ?
C1S C2S 1.405(16) . ?
C2S H2S1 0.9600 . ?
C2S H2S2 0.9600 . ?
C2S H2S3 0.9600 . ?
 
loop_
 _geom_angle_atom_site_label_1
 _geom_angle_atom_site_label_2
 _geom_angle_atom_site_label_3
 _geom_angle
 _geom_angle_site_symmetry_1
 _geom_angle_site_symmetry_3
 _geom_angle_publ_flag
O2 Cu1 O1 76.63(14) . . ?
O2 Cu1 N1 170.45(15) . . ?
O1 Cu1 N1 94.29(16) . . ?
O2 Cu1 N2 94.65(15) . . ?
O1 Cu1 N2 157.45(18) . . ?
N1 Cu1 N2 94.89(16) . . ?
O2 Cu1 Cl1 87.86(12) . 5_655 ?
O1 Cu1 Cl1 94.88(12) . 5_655 ?
N1 Cu1 Cl1 90.01(13) . 5_655 ?
N2 Cu1 Cl1 105.67(13) . 5_655 ?
O2 Cu2 O1 76.67(15) . . ?
O2 Cu2 Cl2 96.57(12) . . ?
O1 Cu2 Cl2 156.50(13) . . ?
O2 Cu2 Cl1 159.94(13) . . ?
O1 Cu2 Cl1 96.42(11) . . ?
Cl2 Cu2 Cl1 96.71(5) . . ?
C8 N1 C7 110.4(4) . . ?
C8 N1 Cu1 117.4(3) . . ?
C7 N1 Cu1 111.1(3) . . ?
C8 N1 H1N 105.7 . . ?
C7 N1 H1N 105.7 . . ?
Cu1 N1 H1N 105.7 . . ?
C10 N2 C11 106.4(4) . . ?
C10 N2 Cu1 114.4(3) . . ?
C11 N2 Cu1 111.4(3) . . ?
C10 N2 H2N 108.1 . . ?
C11 N2 H2N 108.1 . . ?
Cu1 N2 H2N 108.1 . . ?
C1 O1 Cu2 125.3(3) . . ?
C1 O1 Cu1 117.3(3) . . ?
Cu2 O1 Cu1 102.25(17) . . ?
C17 O2 Cu1 122.8(3) . . ?
C17 O2 Cu2 131.6(3) . . ?
Cu1 O2 Cu2 104.45(17) . . ?
Cu2 Cl1 Cu1 104.09(6) . 5_655 ?
O1 C1 C6 118.5(5) . . ?
O1 C1 C2 121.8(5) . . ?
C6 C1 C2 119.7(5) . . ?
C1 C2 C3 119.4(6) . . ?
C1 C2 H2 120.3 . . ?
C3 C2 H2 120.3 . . ?
C4 C3 C2 121.3(6) . . ?
C4 C3 H3 119.4 . . ?
C2 C3 H3 119.4 . . ?
C3 C4 C5 118.6(6) . . ?
C3 C4 Cl3 120.6(5) . . ?
C5 C4 Cl3 120.9(6) . . ?
C6 C5 C4 121.7(6) . . ?
C6 C5 H5 119.2 . . ?
C4 C5 H5 119.2 . . ?
C5 C6 C1 119.4(5) . . ?
C5 C6 C7 121.9(5) . . ?
C1 C6 C7 118.7(5) . . ?
N1 C7 C6 112.9(4) . . ?
N1 C7 H7A 109.0 . . ?
C6 C7 H7A 109.0 . . ?
N1 C7 H7B 109.0 . . ?
C6 C7 H7B 109.0 . . ?
H7A C7 H7B 107.8 . . ?
N1 C8 C9 111.4(4) . . ?
N1 C8 H8A 109.4 . . ?
C9 C8 H8A 109.4 . . ?
N1 C8 H8B 109.4 . . ?
C9 C8 H8B 109.4 . . ?
H8A C8 H8B 108.0 . . ?
O3 C9 C8 107.9(4) . . ?
O3 C9 C10 111.0(4) . . ?
C8 C9 C10 114.4(4) . . ?
O3 C9 H9 107.8 . . ?
C8 C9 H9 107.8 . . ?
C10 C9 H9 107.8 . . ?
N2 C10 C9 113.0(4) . . ?
N2 C10 H10A 109.0 . . ?
C9 C10 H10A 109.0 . . ?
N2 C10 H10B 109.0 . . ?
C9 C10 H10B 109.0 . . ?
H10A C10 H10B 107.8 . . ?
C12 C11 N2 113.4(4) . . ?
C12 C11 H11A 108.9 . . ?
N2 C11 H11A 108.9 . . ?
C12 C11 H11B 108.9 . . ?
N2 C11 H11B 108.9 . . ?
H11A C11 H11B 107.7 . . ?
C13 C12 C17 119.4(5) . . ?
C13 C12 C11 119.3(4) . . ?
C17 C12 C11 121.1(5) . . ?
C12 C13 C14 120.7(5) . . ?
C12 C13 H13 119.7 . . ?
C14 C13 H13 119.7 . . ?
C15 C14 C13 119.2(5) . . ?
C15 C14 Cl4 121.8(5) . . ?
C13 C14 Cl4 118.9(4) . . ?
C14 C15 C16 120.2(5) . . ?
C14 C15 H15 119.9 . . ?
C16 C15 H15 119.9 . . ?
C17 C16 C15 120.7(5) . . ?
C17 C16 H16 119.7 . . ?
C15 C16 H16 119.7 . . ?
O2 C17 C16 121.7(4) . . ?
O2 C17 C12 118.6(5) . . ?
C16 C17 C12 119.7(5) . . ?
N1S C1S C2S 180.000(1) . . ?
C1S C2S H2S1 109.5 . . ?
C1S C2S H2S2 109.5 . . ?
H2S1 C2S H2S2 109.5 . . ?
C1S C2S H2S3 109.5 . . ?
H2S1 C2S H2S3 109.5 . . ?
H2S2 C2S H2S3 109.5 . . ?
 
_diffrn_measured_fraction_theta_max    0.920
_diffrn_reflns_theta_full              29.32
_diffrn_measured_fraction_theta_full   0.920
_refine_diff_density_max    1.307
_refine_diff_density_min   -1.187
_refine_diff_density_rms    0.148
